# Supplementary material for: Polyimide nanocomposites with functionalized SiO2nanoparticles: enhanced processability, thermal and mechanical properties
Source: Royal Society of Chemistry journal article supplement (doi:10.1039/c4ra04952g), 2014-01-01
Supplement: c4ra04952g1.pdf [file c4ra04952g1.pdf]

# Polyimide nanocomposites with functionalized SiO<sub>2</sub> nanoparticles: Enhanced processability, thermal and mechanical properties

Young-Jae Kim,<sup>a</sup> Jong-Heon Kim,<sup>b</sup> Shin-Woo Ha,<sup>a,c</sup> Dongil Kwon,<sup>\*b</sup> Jin-Kyu Lee<sup>\*a</sup>

<sup>a</sup>Department of Chemistry, Seoul National University, Seoul 151-747, Korea

<sup>b</sup>Department of Materials Science and Engineering, Seoul National University, Seoul 151-744, Korea

<sup>c</sup>Present address: Department of Medicine, Emory University, Atlanta, GA 30322, USA

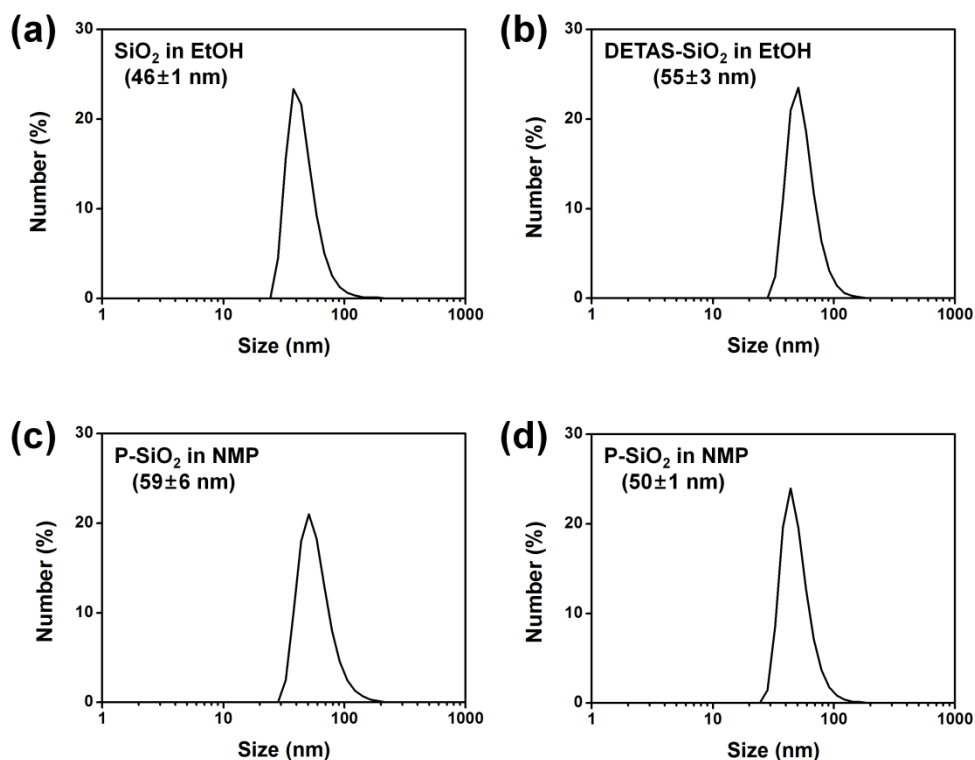

**Figure. S1** Size distributions of (a) SiO<sub>2</sub> in EtOH, (b) DETAS-SiO<sub>2</sub> in EtOH, (c) as-prepared P-SiO<sub>2</sub> in NMP, and (d) P-SiO<sub>2</sub> in NMP after being stored for one year.

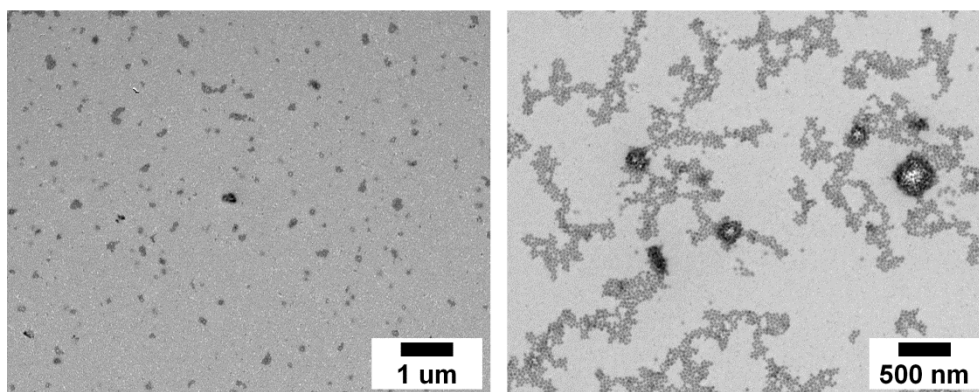

**Figure. S2** TEM images of unmodified SiO<sub>2</sub>-PI nanocomposites. The TEM images were obtained by spin-coating SiO<sub>2</sub>-PAA solution onto a TEM grid, followed by thermal imidization.

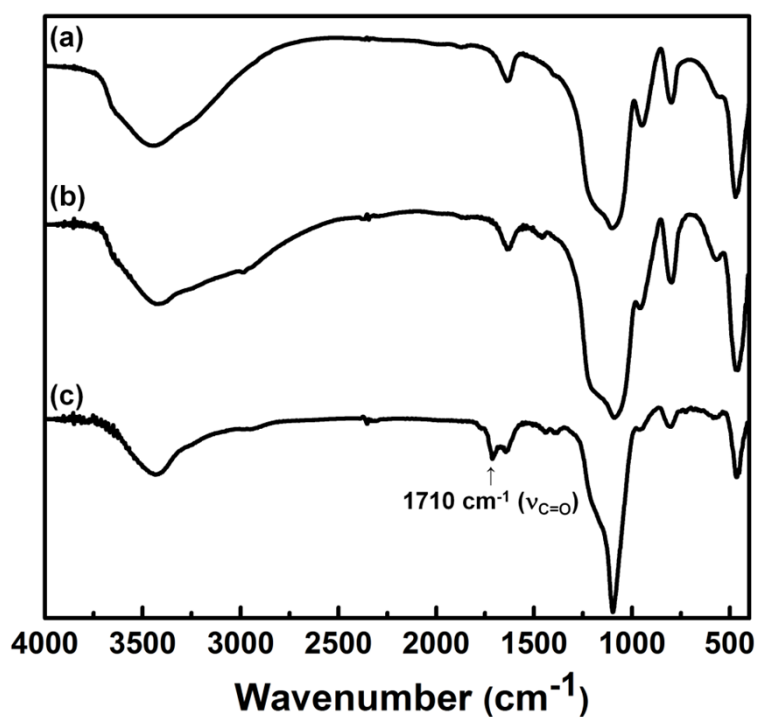

**Figure. S3** FT-IR spectra of (a) unmodified silica nanoparticles, (b) DETAS-SiO<sub>2</sub>, and (c) P-SiO<sub>2</sub>.

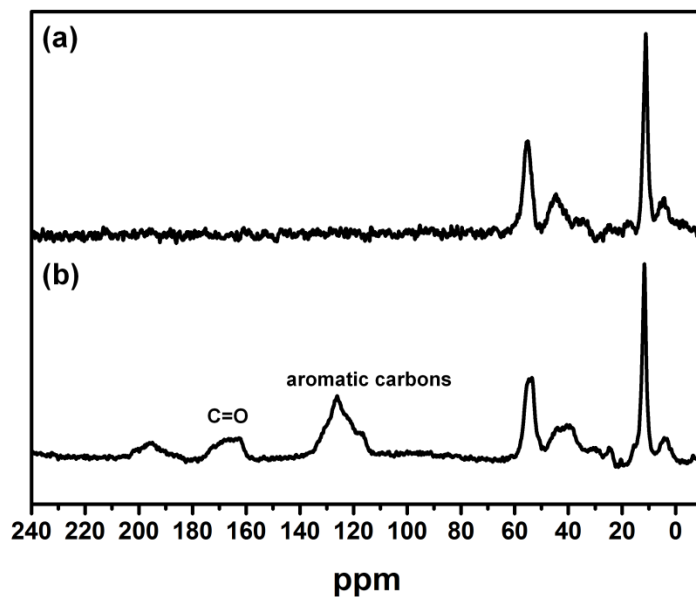

**Figure. S4** Solid  $^{13}\text{C}$  CP/MAS NMR spectra of (a) DETAS-SiO<sub>2</sub> and (b) P-SiO<sub>2</sub>.

**Table S1.** Calculated molar ratio of organic groups on SiO<sub>2</sub> nanoparticles by TGA.

|                                              | Weight percent (wt%) | Molecular weight (g/mol)                      | Relative amount from 100 g sample (mol) | Mole percent of organic groups (mol%) |
|----------------------------------------------|----------------------|-----------------------------------------------|-----------------------------------------|---------------------------------------|
| SiO <sub>2</sub>                             | 87.4                 | 60<br>(for fully condensed SiO <sub>2</sub> ) | 1.5                                     |                                       |
| DETAS on the DETAS-SiO <sub>2</sub>          | 5.6                  | 265.43<br>(for DETAS)                         | $2.1 \times 10^{-2}$                    | 1.4                                   |
| Phthalic anhydride on the P-SiO <sub>2</sub> | 7                    | 148.12<br>(for phthalic anhydride)            | $4.7 \times 10^{-2}$                    | 3.1                                   |

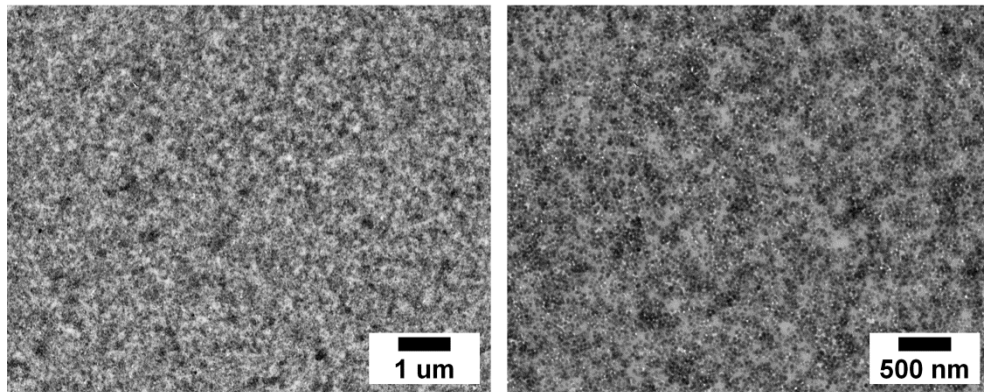

**Figure. S5** TEM images of 40 wt% SiO<sub>2</sub>-PI nanocomposites. The TEM images were obtained by spin-coating SiO<sub>2</sub>-PAA solution onto a TEM grid, followed by thermal imidization.

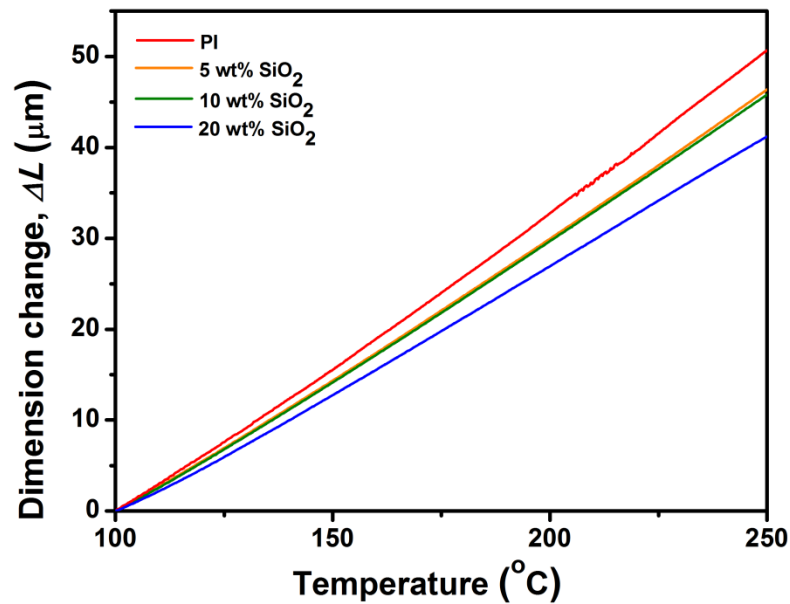

**Figure. S6** Thermal expansion of neat PI film and SiO<sub>2</sub>-PI nanocomposite films with various SiO<sub>2</sub> contents.

## Calculation details

The mathematical equation<sup>1</sup> is described as follows:

$$\alpha_c = \alpha_f \phi_f + \alpha_m \phi_m$$

where the subscripts *c*, *m*, *f* represent nanocomposites, polymer, and filler phase, respectively.  $\alpha$  and  $\phi$  are coefficient of thermal expansion and the volume fraction of the constituents. The coefficient of thermal expansion for polyimide and SiO<sub>2</sub> are 33.9 and 0.55 (10<sup>-6</sup>/°C), respectively.

**Table S2.** The experimental and calculated value of coefficients of thermal expansion of polyimide and SiO<sub>2</sub>-polyimide nanocomposites

| wt. %   | vol. % | Experimental value<br>(10 <sup>-6</sup> /°C) | Calculated value<br>(10 <sup>-6</sup> /°C) |
|---------|--------|----------------------------------------------|--------------------------------------------|
| Neat PI | -      | 33.9                                         | -                                          |
| 5       | 2.2    | 30.8                                         | 33.1                                       |
| 10      | 4.6    | 30.6                                         | 32.2                                       |
| 20      | 9.8    | 27.8                                         | 30.2                                       |

1.H. S. Katz and J. V. Mileski, *Handbook Of Fillers For Plastics*, Springer, 1987, 49.
